# Induction of follicle formation and hair growth by vibrissa dermal papillae implanted into rat ear wounds: vibrissa-type fibres are specified

COLIN A. B. JAHODA

*Department of Biological Sciences, University of Dundee, Dundee, DD1 4HN, Scotland*  
*Current address : Department of Biological Sciences, University of Durham, Durham, DH1 3LE, UK*

## Summary

Adult vibrissa follicle dermal papillae have the capacity to induce hair growth and follicle formation when associated with epidermis from various sources. However, the range of conditions under which hair follicle induction will take place has not been established. The question of whether or not the adult papilla carries information to impose fibre-type specificity has also not been fully answered. This study describes how the implantation of isolated papillae into small incisional cuts on the rat ear pinna resulted in the subsequent emergence of abnormally large hair fibres from the wound sites. Many of these hairs were found to display vibrissa-type characteristics. Histological observations

indicated that the papillae had interacted with the edges of the wound epidermis to produce new, and particularly large follicles, while immunohistochemical staining revealed that early follicle construction was accompanied by a profusion of the basement membrane constituents laminin and type IV collagen in the subjacent dermis. These findings show that adult rat papillae retain the capacity, as displayed by embryonic dermis, to determine vibrissa specificity in induced follicles.

Key words: vibrissa, dermal papilla, hair growth, induction, wounding, epidermis, extracellular matrix.

## Introduction

The development of skin appendages such as feather and hair follicles relies on interactions between the epidermis and dermis. In embryonic development, a sequential exchange of information between these elements underpins a complex series of morphogenetic processes culminating in the formation of adult follicle structures. Many of the spatial, temporal and directional parameters described by these two-way communications have been elucidated in a detailed series of heterotypic recombination experiments (reviews : Wessells, 1967; Kollar, 1972; Sengel, 1976, 1986 and Dhouailly, 1977a). One general finding from these studies is that the origin of the dermal component determines the site-, size- and region-specific distribution pattern of induced appendages. More specifically, concerning hair follicles, recombinations of mouse upper lip dermis with epidermis from different body sites can induce vibrissa follicle formation (Dhouailly, 1977b).

Dermal-epidermal interactions persist in adult skin and skin appendages and are demonstrably important for fibre production and cyclic activities in hair follicles. The use of large rat vibrissa follicles to isolate dermal and epidermal follicular components for transplantation experiments was pioneered by Cohen (1961, 1965). Then, as part of a series of experiments that revealed the dermal influence in adult

follicle interactions, Oliver (1966a,b) showed that the dermal papilla was crucial for hair growth maintenance. The same author went on to demonstrate that isolated papillae stimulated hair growth when associated with epidermis at the base of inactivated follicles (Oliver, 1967). This result implied that the dermal papilla might be the instructive force for fibre initiation at the start of each normal hair growth cycle.

In later work, papillae were shown to have inductive properties comparable with those of embryonic appendage mesenchyme. Isolated papillae induced follicle formation when they were combined with a follicular scrotal sac epidermis, or ear epidermis, and implanted into pockets in rat ear pinnae (Oliver, 1970). Histological evidence of large, fibre-forming follicles suggested that "vibrissa-type" appendages would have been produced but, because the experiment was of limited duration, it was not possible to say whether the inductive information carried by the papillae included the capacity to specify fibre type. One attempt to answer this question by combining adult rat vibrissa papillae with embryonic mouse epidermis (Pisansarakit and Moore, 1986) resulted in the formation of follicles of indeterminate type. This problem of "tract specificity" was originally addressed by Cohen (1965). He suggested that isolated papillae implanted into ear dermis induced follicles, but that these assumed local size and character as a result

of the host dermis exerting regulatory influences. Subsequently, both Cohen (1969) and Oliver (1970) discounted this idea because isolated vibrissa papillae implanted into dermis away from epidermis retain a discrete identity, but do not induce follicle formation (Oliver, 1970).

In the present work, dermal papillae from rat vibrissa follicles were introduced into incisional wounds in the rat ear, to investigate whether dermal papillae would interact with wound epidermis. It was shown that newly formed large follicles at the operational sites produced hairs much larger than those typical of the ear - the majority with vibrissa fibre characteristics. Histological and immunohistochemical observations were used to follow the interactive events.

## Materials and methods

### *Isolation of dermal papillae*

Intact dermal papillae were obtained from inbred PVGC rat vibrissa follicles as previously described (Oliver, 1967; Jahoda and Oliver, 1981). Briefly, the bases of whisker follicles were dissected from the mystacial pads of freshly killed adult rats into Minimal Essential Medium (MEM; Gibco, Paisley). Under a dissecting microscope ( $\times 16$ ), the outer collagen capsule of each bulb was everted using sharpened watchmakers forceps, and the epidermal matrix component removed. The exposed dermal papilla was then cleaned of adherent material, cut from its point of attachment at the level of the basal stalk, and transferred to fresh MEM for operational use. As a further precaution against epidermal contamination, some dissected papillae were maintained in MEM at 4°C for 24 hours prior to a final cleaning and implantation. This step was found to facilitate removal of any adherent epidermis.

### *Host site preparation and implantation procedure*

Since the procedure involved a very minor operation, adult rats aged between 3 and 12 months were generally sedated with ether. Some animals were anaesthetised by intramuscular injection with 0.4 ml of hypnorm (Janssen Pharmaceuticals Ltd) and then intraperitoneally with 0.5 ml of valium (Roche Products Ltd).

Each ear designated for operational use was depilated with Immac (Whitehall laboratories, London), and then cleaned with 70% ethanol, followed by sterile saline solution. The ear was then supported at right angles to the head by loosely clamped artery forceps attached to the ear tip, all supported by a wad of cotton wool. Alternatively, the ear was held by hand. With the tip of a scalpel blade a small incision of 2 to 3 mm in length was then made half way up the ear, to the side of the main blood supply. The wound usually penetrated to the depth of the cartilage layer which runs through the middle of the ear. The cut region was then left for a short time, or swabbed with small balls of sterile absorbent cotton wool to arrest bleeding.

Isolated papillae were then transferred into each cut with watchmakers forceps. Papillae continued to be pushed into the incision site until it was filled. The final number put in depended on the size and depth of the cut, but it usually ranged from 8 to 16. No attempt was made to sew the wound at the end of each operation, as a blood clot was normally seen covering the region within a few minutes. Control incisions were made on the opposite ear and then left without the introduction of papillae. Normally only one incision was made per ear. Twenty four papilla implantations, and twenty control procedures were carried out.

### *Observation and microscopic examination of fibres*

Ears were examined at regular intervals, and hair growth on and around the incision site was monitored. Between 26 days and 9 months postoperatively, half of the experimental animals were killed and their wound sites biopsied for histological observation. Sometimes a photographic record of fibres was obtained at this stage. Some hairs were also cut off for light microscopy and/or scanning electron microscopy. Size, shape and medullary structure were used as criteria to establish if fibres were vibrissa-like. Vibrissae take on the shape of an extended cone, and become progressively wider in diameter from tip to base. They also possess a central medulla which is open, or hollow, unlike the medullae of most large body hairs which is striated or laddered in appearance.

To follow the events taking place just after implantation twelve animals were killed at intervals from 1 hour to 3 weeks postoperatively, and the wound sites fixed for histology, or snap frozen for immunohistochemical analysis.

### *Histology*

For histological purposes, wound areas were fixed in formol saline, dehydrated through graded alcohols, cleared in xylene, and embedded in paraffin wax. Serial sections of 8  $\mu\text{m}$  were then cut, and stained with a combination of Weigert's haematoxylin, Alcian blue, and Curtis's Ponceau S.

### *Immunohistochemistry*

Polyclonal antibodies to fibronectin, laminin and type IV collagen, all raised in rabbits, were obtained from the Institute Pasteur, Lyon, France.

For immunohistochemistry, specimens were embedded in a water-based mounting fluid (Tissue tek III, Miles Scientific), inside aluminium holders, and snap frozen over liquid nitrogen. Sections of 6  $\mu\text{m}$  were cut on a cryostat (Reichert) at  $-20^\circ\text{C}$ , air dried and immunolabeled at room temperature using the indirect method. Sections were immersed for 30 minutes in the primary antibody solutions in phosphate-buffered saline at pH 7.4 (dilutions anti-fibronectin 1:30, anti-laminin 1:30, and anti-type IV collagen 1:40). The second fluorescein isothiocyanate (FITC)-labelled goat anti-rabbit Ig globulin (Wellcome diagnostics) antibody, containing 70  $\mu\text{g}/\text{ml}$  of Evans blue counterstain was applied under the same conditions, and the sections mounted in buffered glycerin or citifluor (Agar aids) embedding medium.

Control procedures included the use of preimmune sera instead of the primary antibody, and conjugated second antibody alone. Fluorescence was absent in all control material.

### *Photography*

Sections were photographed with a Zeiss ICM 405 inverted microscope equipped with epi-illumination for fluorescence observations, using Kodak panatomic X, or tungsten 160 colour transparency film.

## Results

### *Macroscopic observations*

Postoperative scrutiny of wound sites from around 20 days revealed the emergence of hair fibres that were easily distinguishable from the small local hairs by their much larger

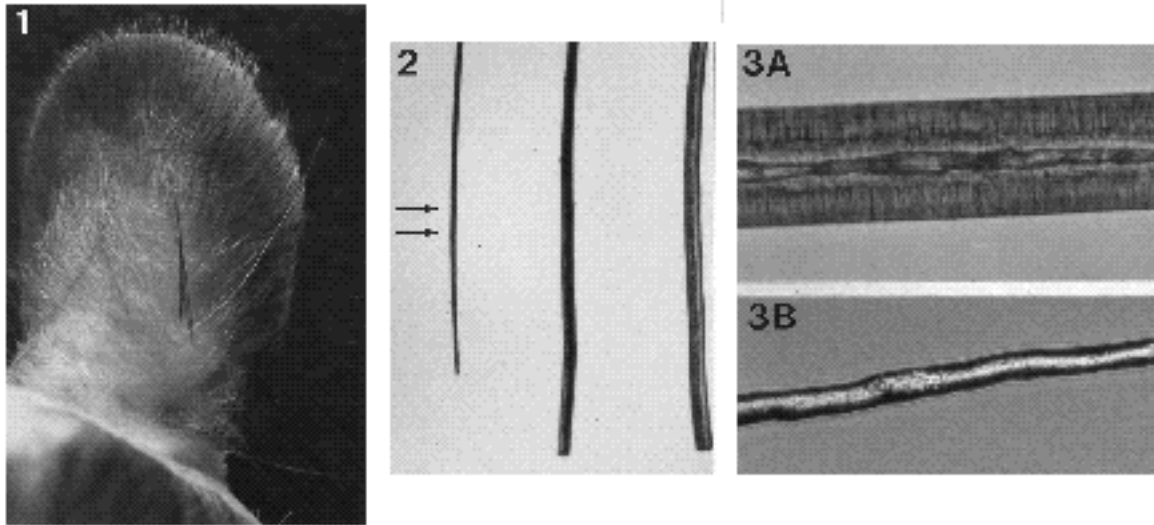

**Fig. 1.** A clump of long straight hairs visible on an ear wound region following papilla implantation. The largest of the fibres is unpigmented.

**Fig. 2.** The cut bases of three long fibres from an experimental site. Two have a broad diameter, while the third (arrowed) has narrowed down from a wide mid-length region. ( $\times 20$ )

**Fig. 3.** Medulla structure in two broad based, vibrissa-type experimental hairs showing (A) an open medulla ( $\times 130$ ), (B) no medullary space ( $\times 55$ ).

size and variable direction of growth. Subsequent observations revealed clusters of long hairs, which were always restricted to the line of the wound scar, and often included both pigmented and unpigmented specimens (Fig. 1). After 4 to 8 weeks, sixteen of the twenty four papilla implantations had produced at least one large fibre, and up to eleven big hairs were visible in one instance - although four or five were more regularly found. The longest single hair was 14 mm in length. Scar tissue was distinguishable at control incision sites, where only minor abnormalities in fibre growth were occasionally observed, and no long hairs seen.

Extended observation of experimental sites did not establish whether individual hairs were growing cyclically. Fibres were visible up to 12 months postoperatively, but an overall reduction in the number of long hairs from any given implantation site was evident over time.

Microscopic examination of a number of the large hairs revealed that they belonged to one of two categories. Most fibres (pigmented and unpigmented) increased in diameter from their tips to their bases. The others had a thin tip and a wider midregion, but then tapered and became narrower basally, at the skin surface (Figs 1,2). Of the former cone-shaped hairs, many had an open central medulla along all or part of their length which is typical of vibrissa follicle fibres (Fig. 3A), while others had no visible medulla at all (Fig. 3B). Scanning electron microscopy confirmed the presence of a medullary opening. The long fibres, which showed a narrowing of diameter towards their bases, revealed a more variable but generally striated or punctate medullary arrangement, corresponding to that seen in the largest fibres of the body pelage, the monotrichs and the awls (Dry, 1926; Priestly, 1966).

#### *Histology and immunohistochemistry*

Follicles found within the papilla implantation wound site

were frequently aligned through different planes and this made longitudinal sectioning difficult. However, in specimens biopsied between 4 and 6 weeks, there was a striking difference between the size of the induced follicles, and adjacent ear follicles. In the wound area, some atypically large follicles had pelage-shaped lower bulbs, larger than adjacent ear appendages, but similar to them in respect of the angle in which they descended into the dermis. Other follicle bulbs had vibrissa-sized papillae containing many more cells than are usually seen in ear follicle papillae (Figs 4,5). Some of these large papillae had a pear shape typical of vibrissa follicles, except that the normal elongated apex was absent (Fig. 4). Many of their bulbs were found close to the wound epidermis, and the follicles often appeared to run at a shallow angle to the skin surface. Often, although a large bulb was visible, it did not incorporate all of the papillary material in the immediate vicinity, since distinctive clusters of dermal papilla cells were seen close by, or joined up with, papilla cells at the base of the follicle (Fig. 5). There was no evidence that the largest follicles had formed the thick collagenous capsule characteristic of sinus follicles, however many newly formed follicles had a substantial external capillary network running externally along their length (Fig. 6). Some new follicles had complex bulbar forms which incorporated multiple papillae (Fig. 7).

When sectioned longitudinally, many of the big follicles displayed an asymmetrical bump as a result of enlargement of outer root sheath on one side; and a dumbbell shape produced by a constriction, or narrowing, just above the level of the bulb (Fig. 8).

The large number of dermal papillae that did not interact with epidermis to form follicular structures were easily visible histologically as discrete dermal cell aggregates. Sometimes the dark papilla cell nuclei were tightly packed together with no extracellular matrix. Alternatively, they

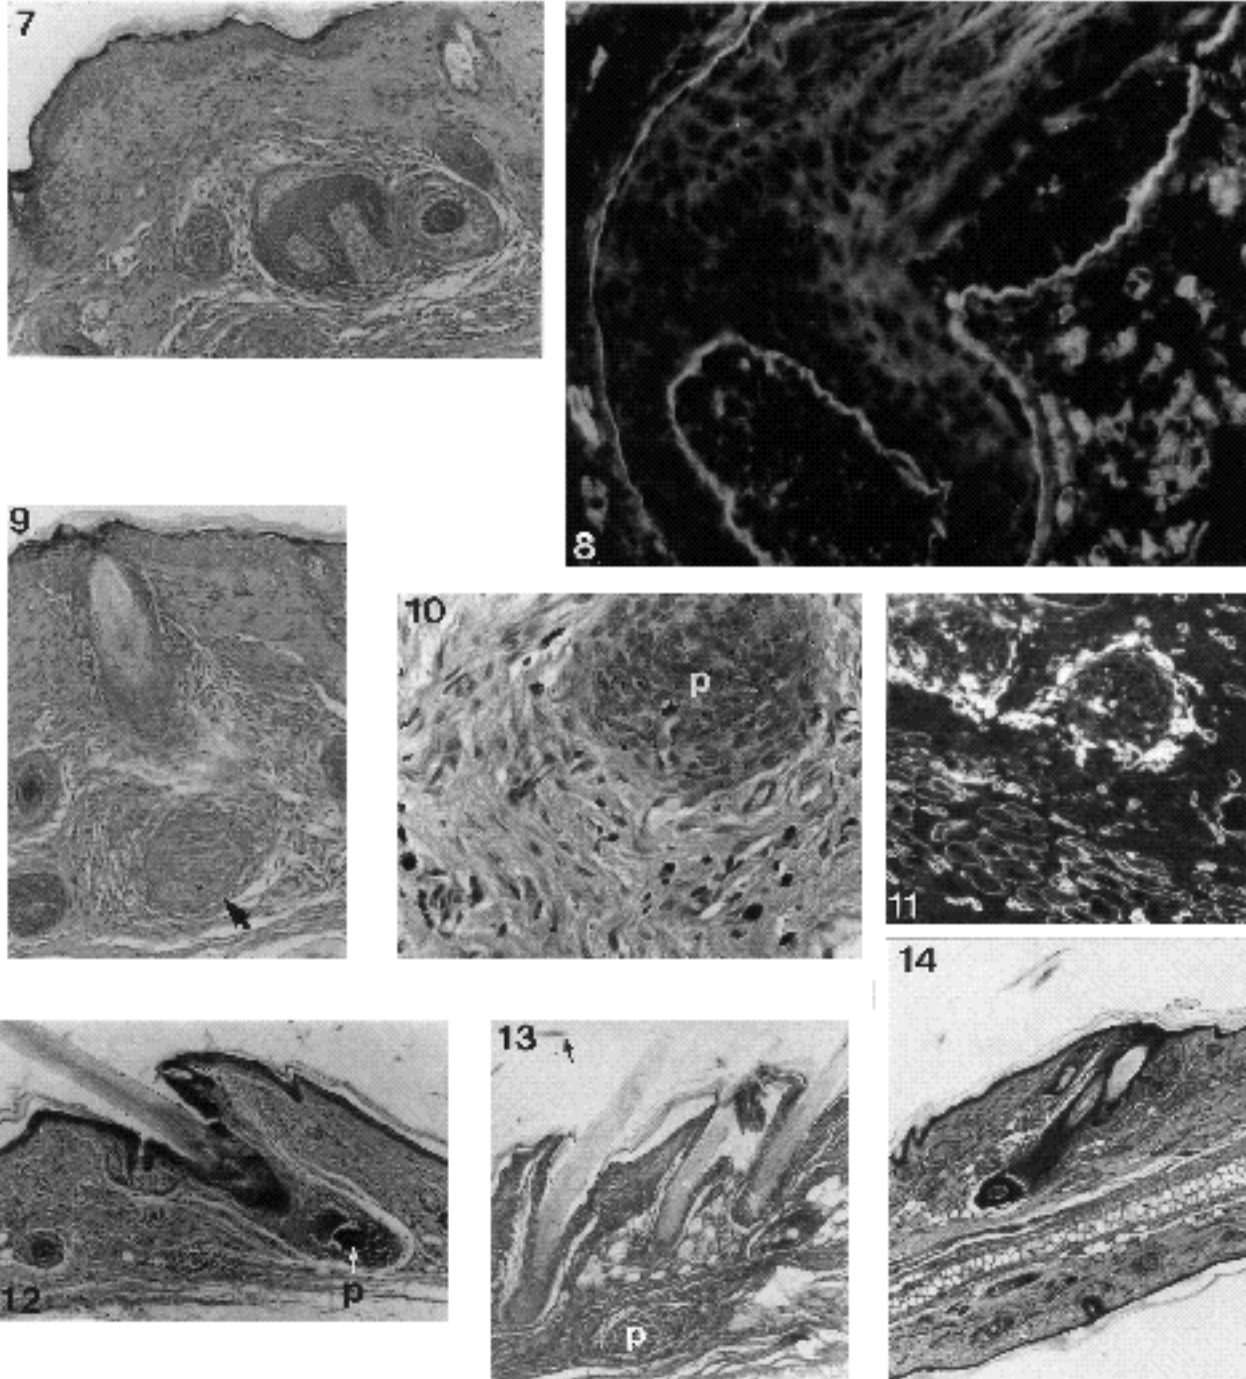

displayed lighter coloured, rounder nuclei and were associated with voluminous Alcian-blue-stained extracellular matrix (Fig. 9). Some papillae appeared to have loose cells in one region and closely associated cells in another. Dark pigment was also seen around many papilla cell clusters (Fig. 10). This was presumably released from papilla cell clusters. Papilla induced angiogenesis was suggested by the large network of small blood vessels seen around implanted papillae, whether in isolation or associated with the basal region of newly formed follicles. This phenomenon was emphasised by the intense staining of papilla-associated

vasculature by laminin and type IV collagen antibodies (Fig. 11).

Among implant specimens sectioned more than three months postoperatively, there were some large follicles growing hair (anagen) and others with club fibres but whose bulbs were not making hair (telogen) (Fig. 12). At 6 months, one group of five follicles was found to be in synchronous telogen (Fig. 13); however, this was not a universal pattern as later biopsies contained anagen and telogen follicles side by side (Fig. 14). Isolated dermal papillae were still visible as discrete balls of cells within the dermis after 10 months.

**Fig. 7.** The base of another large follicular structure at a wound site, displaying a double dermal papilla within a single bulb. ( $\times 80$ )

**Fig. 8.** Higher powered view of another large experimental follicle highlighting follicle asymmetry and constriction above the bulb. ( $\times 370$ )

**Fig. 9.** Two rounded clusters of dermal papilla cells fairly deep in an ear wound which have not interacted with epidermis. The papilla at the centre (arrowed) has an anagen-like appearance, in that the cells are well separated with profuse extracellular matrix. By contrast, in the telogen-like papilla cell aggregation to its left, the cells are tightly packed, with little extracellular volume. The large vibrissa-type fibre above the central papilla belongs to a newly formed follicle in a different plane of section. ( $\times 85$ )

**Fig. 10.** An isolated dermal papilla cell cluster (p) with an appearance similar to an active (anagen) papilla in situ. The cells are surrounded by Alcian blue-stained extracellular material. Dark patches of pigment are visible near to the structure, and many capillaries are present around its periphery. ( $\times 280$ )

**Fig. 11.** Strong laminin marking of the capillary network around two papilla explants indicates that papillae produce an angiogenic influence. Some granular staining is also discernable in the extracellular matrix of the papillae. ( $\times 90$ )

**Fig. 12.** A large follicle containing a vibrissa-type fibre at seven months post-operatively. The papilla cells (p) at the follicle base are tightly packed, and are not enclosed by epidermis. Note the shallow angle of the follicle, and the presence of sebaceous glands. ( $\times 70$ )

**Fig. 13.** Three of a group of large follicles, all containing emergent whisker-type fibres, and all in telogen, six months post-operatively. The fibres can be compared with a section of ear hair which is visible above the skin surface (arrowed). An isolated cluster of papilla cells (p), is visible within the dermis. ( $\times 92$ )

**Fig. 14.** Two closely positioned follicles containing vibrissa-type hairs in a wound site after ten months. The longer structure has an active bulb, and is producing a fibre, while the shorter appendage is in telogen. ( $\times 36$ )

Histology of wound areas some days after operation revealed several examples of follicle construction. Papilla clumps were associated with downward projections of epidermal cells (Fig. 15), or found directly below an epidermal column (Fig. 16). Most commonly, papillae were seen between epidermal downgrowths near the surface of the skin - papilla cells possibly trapped by the wound edges as they came together (Fig. 17). Immunohistochemistry showed that the enclosed papilla always marked strongly for laminin and type IV collagen, with particularly bright marking of capillaries, and an unusual line of non-vascular granular staining, which descended straight down from the enclosed papilla cells into the dermis (Figs 18,19). As well as capillaries, small nerve branches were sometimes visible along the same line. Fibronectin marking was intense all through the wound dermis.

Examination of control incisions revealed only established elements of skin wound healing. Early on there was strong fibronectin marking throughout the dermis. Around the periphery of the wound, many follicles appeared to be in a telogen-like state, or somewhat distorted, but the central wound region was initially bare. At several months, the wound scar was smaller, presumably as a result of some contraction.

## Discussion

It is well established that isolated dermal papillae from mature whisker follicles can be associated with skin epidermis from various sites and initiate follicle morphogenesis and fibre production (Oliver, 1980). In the present study, as a result of vibrissa dermal papilla association with wound epidermis, it appeared that not only large but specifically vibrissa-type fibres were produced. Vibrissa follicles have several specialised features thought to be associated with their sensory function, including a thick collagenous outer capsule, blood sinuses and the ringwulst. Although the largest follicles seen after implantation lacked these peripheral components, when newly formed, they had an hour glass shape which is typical of developing vibrissa but not pelage follicles (Dhouailly, 1977b). It is not possible to distinguish between vibrissa and pelage fibres by analysis of their keratin composition (Delorme, 1989). However, the criteria employed to establish vibrissa fibre type, size, thickness, medulla structure and elongated cone shape were all shown by hairs growing from the wound sites. The latter feature is particularly revealing, since it provides information about how the fibres grow. The elongated cone shape of the whisker represents a continuous increase in fibre productivity until just before growth ceases. By contrast, the narrowing of the largest coat hair fibres from approximately mid-length (Dry, 1926; Priestly, 1966) must represent a gradual slow-down of fibre formation towards the end of each growth cycle. The important point shown by this study is that the adult whisker dermal papilla retains the information needed to determine hair fibre type as well as follicle size, and that this property is manifested in adult induction. In other words, the regional specificity of embryonic dermis is maintained and is highly localised in the adult follicle.

In relation to embryonic skin appendage development, the present results are consistent with recombination experiments in which the dermis has been shown to determine the site, distribution pattern and size of appendages, as well as their species-specific morphology (Sengel, 1986). In mouse embryos, the choice between the formation of whisker or pelage follicles resides in the dermis, and the results of recombination experiments involving dermis and epidermis of the upper lip and dorsal region led Dhouailly (1977b) to conclude that in some respects the development of vibrissa follicles might predominate over pelage type. Sengel (1986) suggests that information for appendage formation is a multistep process and, in the current work, a group of papilla cells react with wound epithelium to produce a hair follicle, followed by a fibre that is characteristic of the dermis of origin. Some follicle formation appeared to start with papillae interacting with the edges of the wound epithelium to produce structures that were near to the skin surface and at different angles to each other and the prevailing local ear follicles. This reinforced the point that completely new follicle structures had been made. However, much wound epithelium is believed to derive from hair follicle epidermis (Eisen et al., 1955; Krawczyk, 1971; Pang et al., 1978). Therefore, it can be argued that papillae that are combined with follicle-derived wound epidermis have to provide less of an inductive influence to

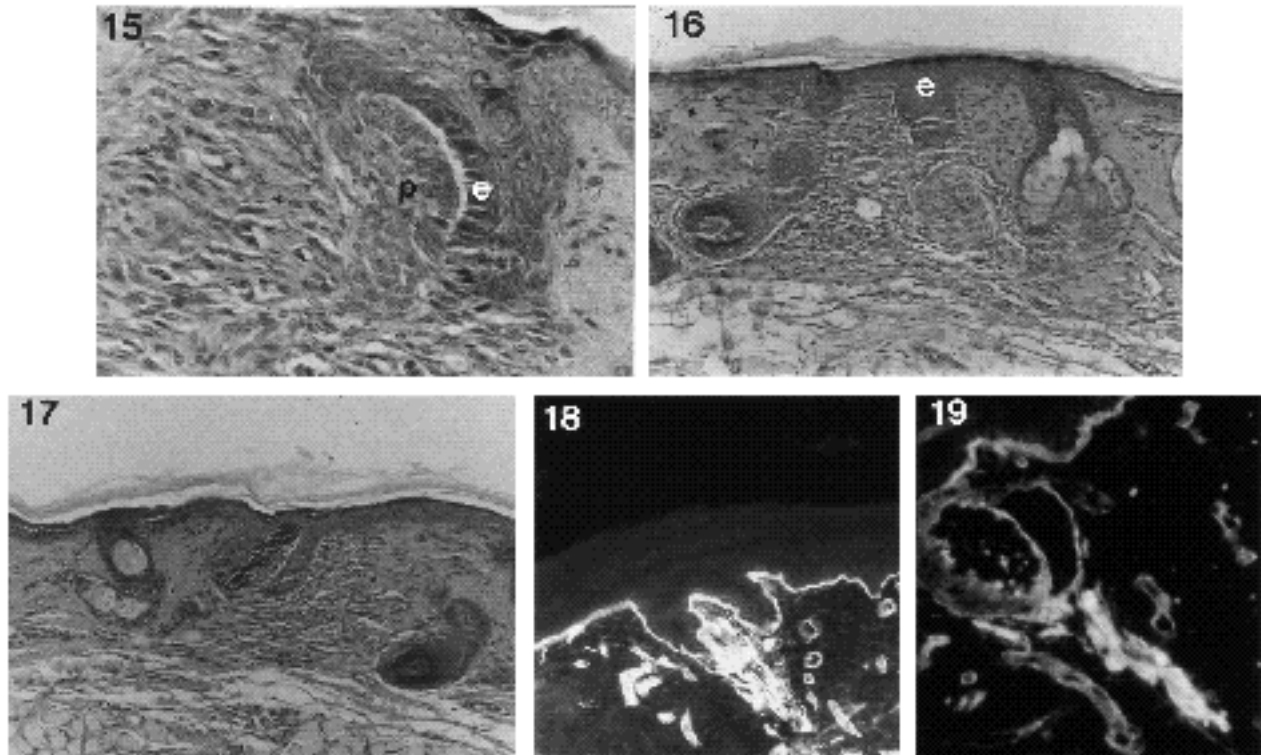

**Fig. 15.** Papilla cells (p) associated with epidermal projections (e) in an implant site at 16 days. A degree of organization has taken place in the basal layer of the epidermis. ( $\times 230$ )  
**Fig. 16.** Transverse section through a wound region at 16 days postoperatively. Follicles are seen to either side of a central broad epidermal peg (e), which has a dermal condensation immediately below it, and a larger ball of papilla cells directly underneath this ( $\times 90$ ).  
**Fig. 17.** Closely associated dermal papilla cells in between downward projections of wound epidermis at 14 days ( $\times 90$ ).  
**Fig. 18.** Another group of papilla cells inside wound epidermis after 19 days. Massive amounts of marked extracellular material are visible within the papilla cluster, and descending straight down into the dermis. Note that this association appears at the thickest region of wound epidermis, and that there are no normal appendages locally. ( $\times 195$ )  
**Fig. 19.** Papilla material enclosed within epidermal downgrowths 18 days after wounding labelled for type IV collagen. Brightly stained capillaries descend directly from the structure, and a small nerve branch could also be traced to this area. Substantial amounts of loose extracellular material can also be seen projecting down into the dermis, and granular staining is present in the papilla. ( $\times 118$ )

stimulate new follicle production, than if they had to interact with a follicular epidermis. However, this does not alter the fact that a different type of fibre was produced.

The current finding that large follicles and hairs persisted over a period of many months argues strongly against local skin dermis exerting a controlling action over follicular dermis (Cohen, 1965), although longer term modulatory influences cannot be excluded. The fact that long-term biopsies contained follicles in anagen suggested that cyclic hair production was taking place at the level of individual structures. The observation that at different biopsy times some isolated papillae had an anagen-like appearance and extracellular content, while others were telogen-like, gives support to the idea put forward by Oliver (1980) that papillae might continue with an intrinsic, hair cycle-related rhythm, even when separated from epidermis.

In this work, compared with previous induction experiments involving more sophisticated transplantation protocols (Oliver, 1970; Pisansarakit and Moore, 1986), emergent fibres were produced more rapidly, and greater numbers of complete follicular structures were formed. One reason may be because in the current work papillae were

interacting with epidermis at the skin surface, as they do in embryonic development, rather than deeper down. In the present experiment, growth factors such as PDGF, FGF and TGF will have been produced as part of the wound repair process (for reviews see Huang et al., 1988; Fox, 1988; and Assoian, 1988), but these would also have been present with previous protocols. In developing skin, a high density of fibronectin, the presence of glycosaminoglycans and rarefied fibrous collagen are considered to be conditions that stimulate morphogenesis and histogenic changes (Sengel, 1986). The wound sites used in this work initially created a "space" that was almost free of fibrous collagen, but that was filled with fibronectin, and glycosaminoglycans and proteoglycans in the papillae themselves. Thus the region was provided with a labile extracellular milieu, within which morphogenesis would be facilitated, and follicles could develop and extend. A parallel to this is described in embryonic wound healing (Whitby and Ferguson, 1991), where a loose wound scaffolding rich in glycosaminoglycans, proteoglycans and glycoproteins is thought to facilitate cell movement, compared with a denser matrix found in adult wounds.

The presence of basement membrane components underneath papillae during the early stages of follicle formation is not described in embryonic follicle development (Mauger et al., 1987), and has no clear parallels in the normal adult hair growth cycle (Couchman and Gibson, 1985). However, in adult whisker follicle experimental regeneration (Jahoda et al., 1992), the same basement membrane components are found in the follicle mesenchyme or dermal sheath cells that are remodelling a new papilla.

In conclusion, this work extends understanding of the inductive powers of the vibrissa follicle dermal papilla and provides a simple method of studying dermal-epidermal interactions in a wound context.

I am grateful to Dr Roy Oliver for his encouragement and helpful discussion; Dr Mandy Reynolds for her cheerful support and reading of the manuscript and Bruce Pert for his assistance with photography. I thank the Wellcome Trust for equipment grant funding. As a beneficiary of a Royal Society 1983 University Research Fellowship, I am particularly grateful to the Royal Society.

## References

- Assoian, R.K.** (1988). The role of growth factors in tissue repair IV: Type B transforming growth factor and stimulation of fibrosis. In *The Molecular and Cellular Biology of Wound Repair* (ed. R.A.F. Clark and P.M.Hensen), pp. 273-280. New York, London: Plenum Press.
- Cohen, J.** (1961). The transplantation of individual rat and guinea-pig whisker papillae. *J. Embryol. Exp. Morph.* **9**, 117-127.
- Cohen, J.** (1965). The dermal papilla. In *Biology of the Skin and hair Growth*. (ed. A.G. Lyne and B.F. Short). pp.183-199. Sydney: Angus and Robertson.
- Cohen, J.** (1969). Interactions in the skin. *Br.J.Dermatol.* **81**, 46-54.
- Couchman, J.R. and Gibson, W.J.** (1985). Expression of basement membrane components through morphological changes in the hair growth cycle. *Dev. Biol.* **108**, 290-298.
- Delorme, P.** (1989). Identification et classification des keratines de souris. Expression des keratines epidermiques au cours du developpement et lors de recombinaisons dermo-epidermiques. Thesis, University of Grenoble I.
- Dhouailly, D.** (1977a). Dermo-epidermal interactions during morphogenesis of cutaneous appendages in amniotes. *Front. Matrix Biol.* **4**, 86-121.
- Dhouailly, D.** (1977b). Regional Specification of cutaneous appendages in mammals. *Roux's Arch. Dev. Biol.* **181**, 3-10.
- Dry, F.W.** (1926). The coat of the mouse (*Mus musculus*). *J. Genet.* **16**, 287-340.
- Eisen, A.Z., Holyoke, J.B. and Lobitz, W.C.** (1955). Responses of the superficial portion of the human pilosebaceous apparatus to controlled injury. *J. Invest. Derm.* **25**, 145-156.
- Fox, G.M.** (1988). The role of growth factors in tissue repair III: Fibroblast growth factor. In *The Molecular and Cellular Biology of Wound Repair* (ed. R.A.F. Clark and P.M.Hensen), pp.265-271. New York, London: Plenum Press.
- Huang, J.S., Olsen, T.J. and Huang, S.S.** (1988). The role of growth factors in tissue repair I: Platelet-derived growth factor. In *The Molecular and Cellular Biology of Wound Repair* (ed. R.A.F. Clark and P.M.Hensen), pp.243-251. New York, London: Plenum Press.
- Jahoda, C.A.B. and Oliver, R.F.** (1981). The growth of vibrissa dermal papilla cells in vitro. *Br. J. Dermatol.* **105**, 623-627.
- Jahoda, C.A.B., Horne, K.A., Mauger, A., Bard, S. and Sengel, P.** (1992). Cellular and extracellular involvement in the regeneration of the rat lower vibrissa follicle. *Development* **114**, 887-897.
- Kollar, E.J.** (1972). The development of the integument: spatial, temporal and phylogenetic factors. *Am. Zoologist*, **12**, 125-135.
- Krawczyk, W.S.** (1971). A pattern of epidermal migration during wound healing. *J. Cell. Biol.* **49**, 247-263.
- Mauger, A., Emomard, H., Hartmann, D.J., Foidart, J.M. and Sengel, P.** (1987). Immunofluorescent localization of collagen types I,III, and IV, fibronectin, laminin, and basement membrane proteoglycan in developing mouse skin. *Roux's Arch. Dev. Biol.* **196**, 295-302.
- Oliver, R.F.** (1966a). Whisker growth after removal of the dermal papilla and lengths of the follicle in the hooded rat. *J. Embryol. Exp. Morph.* **15**, 341-347.
- Oliver, R.F.** (1966b). Histological studies of whisker regeneration in the hooded rat. *J. Embryol. Exp. Morph.* **16**, 231-244.
- Oliver, R.F.** (1967). The experimental induction of whiskers in the hooded rat by implantation of dermal papillae. *J. Embryol. Exp. Morph.* **18**, 43-51.
- Oliver, R.F.** (1970). The induction of hair follicle formation in the adult hooded rat by vibrissa dermal papillae. *J. Embryol. Exp. Morph.* **23**, 219-236.
- Oliver, R.F.** (1980). Local interactions in mammalian hair growth. In *The Skin of Vertebrates*, (ed. R.I.C. Spearman and P.A. Riley), pp.199-210. London: Academic Press.
- Pang, S.C., Daniels, W.H. and Buck, R.C.** (1978). Epidermal migration during the healing of suction blisters in rat skin: a scanning and transmission electron microscopic study. *Am. J. Anat.* **153**, 177-192.
- Pisansarakit, P. and Moore, G.P.M.** (1986). Induction of hair follicles in mouse skin by rat vibrissa dermal papillae. *J.Embryol. Exp. Morph.* **94**, 113-119.
- Priestly, G.C.** (1966). Rates and duration of hair growth in the albino rat. *J. Anat.* **100**, 147-157.
- Sengel, P.** (1976). *Morphogenesis of skin. Developmental and Cell Biology Series.* (ed. M. Abercrombie, D.R. Newth, J.G.Torrey), Cambridge: Cambridge University Press.
- Sengel, P.** (1986). Epidermal-dermal interaction. In *Biology of the Integument*, vol. 2, *Vertebrates* (ed. J. Bereiter-Hahn, A.G. Matoltsy and K.S. Richards), pp.374-408. Berlin, Heidelberg: Springer-Verlag.
- Wessells, N.K.** (1967). Differentiation of epidermis and epidermal derivatives. *New Engl. J. Med.* **277**, 21-33.
- Whitby, D.J. and Ferguson, M.W.J.** (1991). The extracellular matrix of lip wounds in fetal, neonatal and adult mice. *Development* **112**, 651-668.

(Accepted 8 April 1992)

dev1788 legend for colour tip-in

**Fig. 4.** A region of an ear wound that has produced big fibres, showing one large follicle with a pear-shaped and Alcian blue-stained dermal papilla. The blue marking is indicative of glycosaminoglycan production. Another large follicle, which has been cut transversely, is visible at a shallow plane to the skin surface, and a cluster of unassociated dermal papilla cells (arrow) is positioned deeper in the dermis. ( $\times 70$ )

**Fig. 5.** The base of a large experimental follicle, where not all of the whisker papilla cells have been enclosed by the epidermal component. Note the blue staining of these loose papilla cells and the shallow depth and unusual orientation of this follicle, and the one to its right. ( $\times 70$ )

**Fig. 6.** A large follicle 25 days after wounding. Vasculature runs down its length just external to the follicular dermis. Note that the basal stalk and lower dermal sheath contain Alcian blue stained extracellular matrix and patches of pigment, suggestive of a dermal papilla origin. ( $\times 112$ )
